# Supplementary material
Source: PubMed Central journal article supplement (PMC3743463)
Supplement: supp_blood-2013-03-490565_blood-2013-03-490565-1.pdf [file supp_blood-2013-03-490565_blood-2013-03-490565-1.pdf]

## Supplemental Data

**Title:** Cardiovascular toxicity and titin cross-reactivity of affinity enhanced T cells in myeloma and melanoma

**Short Title:** Cardiovascular toxicity and titin cross-reactivity

**Authors:** Gerald P. Linette,<sup>1,\*</sup> Edward A. Stadtmauer,<sup>2,\*</sup> Marcela V. Maus,<sup>2,\*</sup> Aaron P. Rapoport,<sup>3</sup> Bruce L. Levine,<sup>2</sup> Lyndsey Emery,<sup>2</sup> Leslie Litzky,<sup>2</sup> Adam Bagg,<sup>2</sup> Beatriz M. Carreno,<sup>1</sup> Patrick J. Cimino,<sup>1</sup> Gwendolyn K. Binder-Scholl,<sup>4</sup> Dominic P. Smethurst,<sup>4</sup> Andrew B. Gerry,<sup>4</sup> Nick J. Pumphrey,<sup>4</sup> Alan D. Bennett,<sup>4</sup> Joanna E. Brewer,<sup>4</sup> Joseph Dukes,<sup>5</sup> Jane Harper,<sup>5</sup> Helen K. Tayton-Martin,<sup>4</sup> Bent K. Jakobsen,<sup>4,5</sup> Namir J. Hassan,<sup>5</sup> Michael Kalos,<sup>2</sup> Carl H. June<sup>2</sup>

\* Equal contribution

### Supplemental Content:

**Supplemental Table 1.** Calculations of in vivo expansion of MAGE-A3a3a T cells.

**Supplemental Figure S1.** Original protocol schematics.

**Table S1. Calculations of in vivo expansion of MAGE-A3<sup>a3a</sup> T cells.**

|                |                                                            | <u>Day 0</u>                                                 | Case 1                      | Case 2                      |
|----------------|------------------------------------------------------------|--------------------------------------------------------------|-----------------------------|-----------------------------|
|                |                                                            | Total number of T cells infused                              | 1x10 <sup>10</sup>          | 5x10 <sup>9</sup>           |
|                |                                                            | <b>Total number of MAGE-A3<sup>a3a</sup> T cells infused</b> | <b>5.3x10<sup>9</sup></b>   | <b>2.4x10<sup>9</sup></b>   |
| <u>Autopsy</u> |                                                            |                                                              |                             |                             |
| Blood          | Total patient weight (kg)                                  |                                                              | 88.2                        | 105                         |
|                | Total blood volume (ml)                                    |                                                              | 6615                        | 7840                        |
|                | # MAGE-A3 <sup>a3a</sup> cells per ul of blood             |                                                              | 100                         | 370                         |
|                | <b># MAGE-A3<sup>a3a</sup> cells in total blood volume</b> |                                                              | <b>6.61x10<sup>8</sup></b>  | <b>2.90x10<sup>9</sup></b>  |
| Heart          | Weight (gm)                                                |                                                              | 460                         | 542                         |
|                | # total cells in heart                                     |                                                              | 4.6x10 <sup>11</sup>        | 5.42x10 <sup>11</sup>       |
|                | # vector copies/ug gDNA in heart                           |                                                              | 2600                        | 4270                        |
|                | <b># MAGE-A3<sup>a3a</sup> cells</b>                       |                                                              | <b>7.70x10<sup>9</sup></b>  | <b>1.49x10<sup>10</sup></b> |
| Spleen         | Weight (gm)                                                |                                                              | 260                         | 250                         |
|                | # total cells in spleen                                    |                                                              | 2.6x10 <sup>11</sup>        |                             |
|                | # vector copies/ug gDNA in spleen                          |                                                              | 16300                       | n/a                         |
|                | <b># MAGE-A3<sup>a3a</sup> cells</b>                       |                                                              | <b>2.72x10<sup>10</sup></b> | <b>n/a</b>                  |
| Bone marrow    | Marrow mass at age 65 (gm)                                 |                                                              | 630                         | 630                         |
|                | # total cells in marrow                                    |                                                              |                             | 6.3x10 <sup>11</sup>        |
|                | Marrow copies/ug gDNA                                      |                                                              | n/a                         | 17400                       |
|                | <b># MAGE-A3<sup>a3a</sup> cells</b>                       |                                                              | <b>n/a</b>                  | <b>7.07x10<sup>10</sup></b> |
| Lungs          | Weight (gm)                                                |                                                              | 2280                        | 960                         |
|                | # total cells in lungs                                     |                                                              | 2.28x10 <sup>12</sup>       | 9.60x10 <sup>11</sup>       |
|                | # vector copies/ug gDNA lung                               |                                                              | 2050                        | 37500                       |
|                | <b># MAGE-A3<sup>a3a</sup> cells</b>                       |                                                              | <b>3.01x10<sup>10</sup></b> | <b>2.32x10<sup>11</sup></b> |
| Liver          | Weight (gm)                                                |                                                              | 1750                        | 1630                        |
|                | # total cells in liver                                     |                                                              | 1.75x10 <sup>12</sup>       | 1.63x10 <sup>12</sup>       |
|                | # vector copies/ug gDNA liver                              |                                                              | 2310                        | 12900                       |
|                | <b># MAGE-A3<sup>a3a</sup> cells</b>                       |                                                              | <b>2.60x10<sup>10</sup></b> | <b>1.36x10<sup>11</sup></b> |
| Kidneys        | Weight (gm)                                                |                                                              | 380                         | 337                         |
|                | # total cells in kidney                                    |                                                              | 3.80x10 <sup>11</sup>       | 3.37x10 <sup>11</sup>       |
|                | # vector copies/ug gDNA kidney                             |                                                              | 689                         | 2590                        |
|                | <b># MAGE-A3<sup>a3a</sup> cells</b>                       |                                                              | <b>1.68x10<sup>9</sup></b>  | <b>5.61x10<sup>9</sup></b>  |
| Brain          | Weight (gm)                                                |                                                              | 1450                        | 1310                        |
|                | # total cells in brain                                     |                                                              | 1.45x10 <sup>12</sup>       | 1.31x10 <sup>12</sup>       |
|                | # vector copies/ug gDNA brain                              |                                                              | 38.3                        | 441                         |
|                | <b># MAGE-A3<sup>a3a</sup> cells</b>                       |                                                              | <b>3.56x10<sup>8</sup></b>  | <b>3.72x10<sup>9</sup></b>  |
|                |                                                            | <b>Total # MAGE-A3<sup>a3a</sup> cells at autopsy</b>        | <b>9.37x10<sup>10</sup></b> | <b>4.65x10<sup>11</sup></b> |
|                |                                                            | <b>Fold expansion <i>in vivo</i></b>                         | <b>17.7</b>                 | <b>194</b>                  |

**Legend to Supplemental Table 1.** Weights of organs were measured at autopsy in both patients.

Copies of vector were measured per microgram of genomic DNA in various organs as indicated. We made the following assumptions: for total blood volume, we assumed that total blood volume was a function of weight (75 ml blood/kg). For solid organs, we assumed that 1 kg contained  $1 \times 10^{12}$  cells. The current estimate for human male diploid genome nuclei of cells in G1 phase of the cell cycle is 6.436 pg of genomic DNA per cell. Therefore, we estimated that the number of MAGE-A3<sup>a3a</sup> T cells in an organ was (# of total cells in organ \* 0.000006436 microgram of genomic DNA/cell \* measured copies of vector/microgram genomic DNA). The total number of MAGE-A3<sup>a3a</sup> T cells was calculated by adding the total number of MAGE-A3<sup>a3a</sup> T cells in total blood volume and in each organ (i.e. total blood volume + heart + spleen or bone marrow + lungs + liver + kidneys + brain). We did not include pericardial fluid from Case 2, which contained a large number of cell markings by PCR, because we did not have a cell count on the fluid; similarly, we did not have complete data for skeletal muscle or the GI tract; these could all result in an underestimate. However, we also recognize that there may be an overestimation factor based on vascularization of tissues (double counting of marked cells in blood and in the vascular portion of the tissue, especially lung).

# Melanoma protocol schema (Case 1)

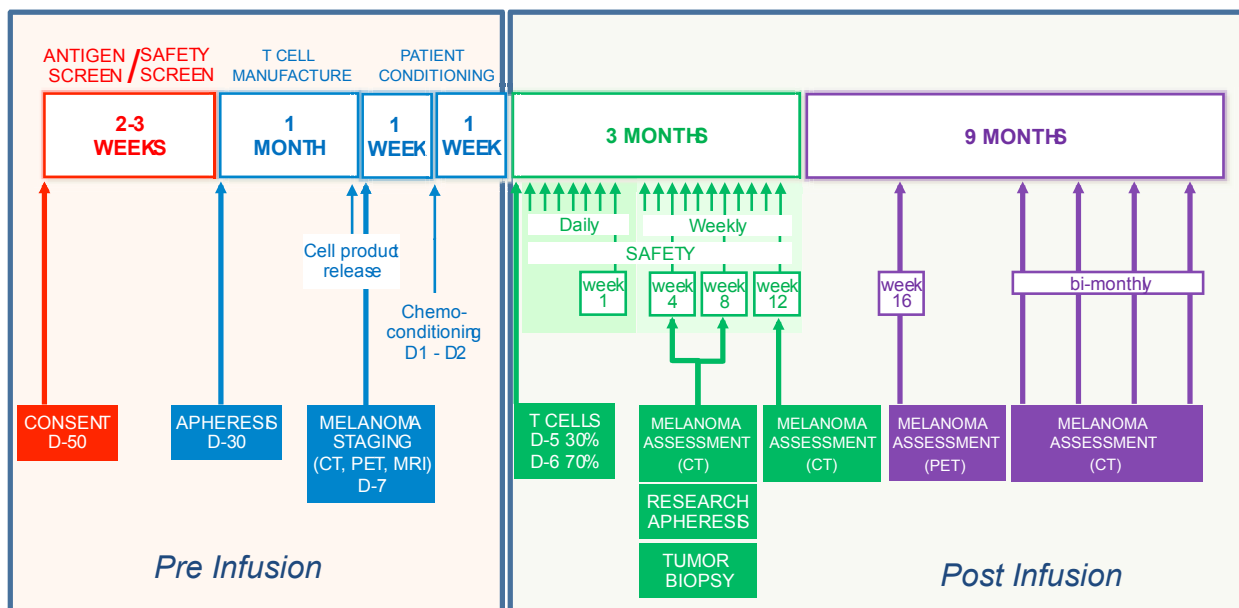

# Myeloma protocol schema (Case 2)

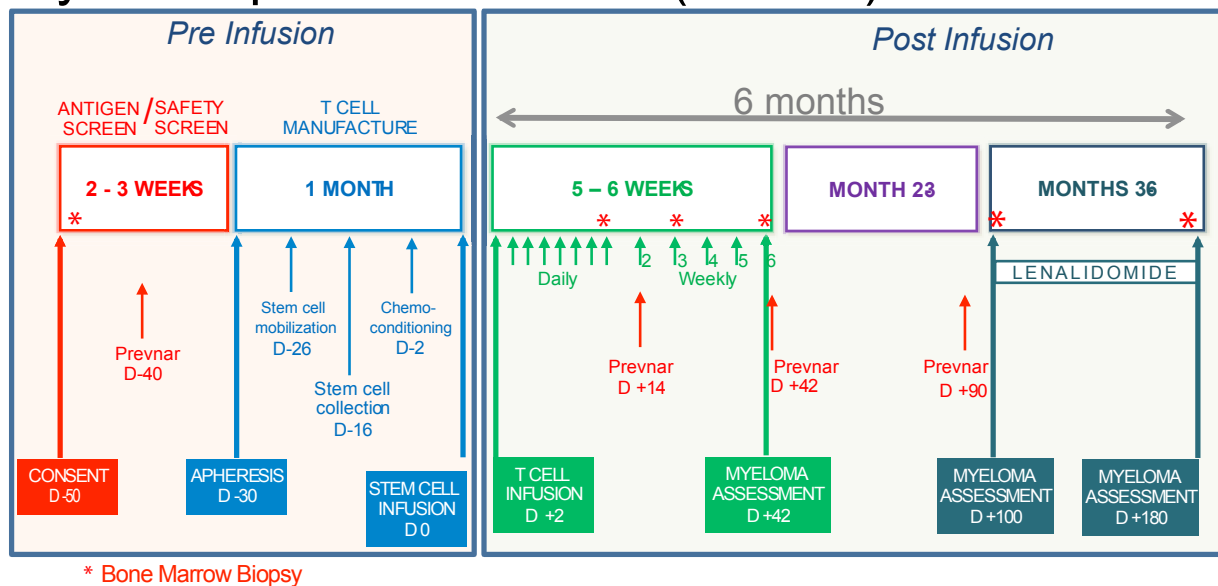

**Figure S1. Original protocol schematics.** Top panel: Melanoma study UPCC1611 (Case1).

Bottom panel: Myeloma study UPCC1411 (Case 2).
